# Supplementary material for: Mitigation of bias sources for atmospheric temperature and humidity in the mobile Weather & Aerosol Raman Lidar (WALI)
Source: Copernicus journal article supplement (doi:10.5194/amt-2021-132), 2021-07-29

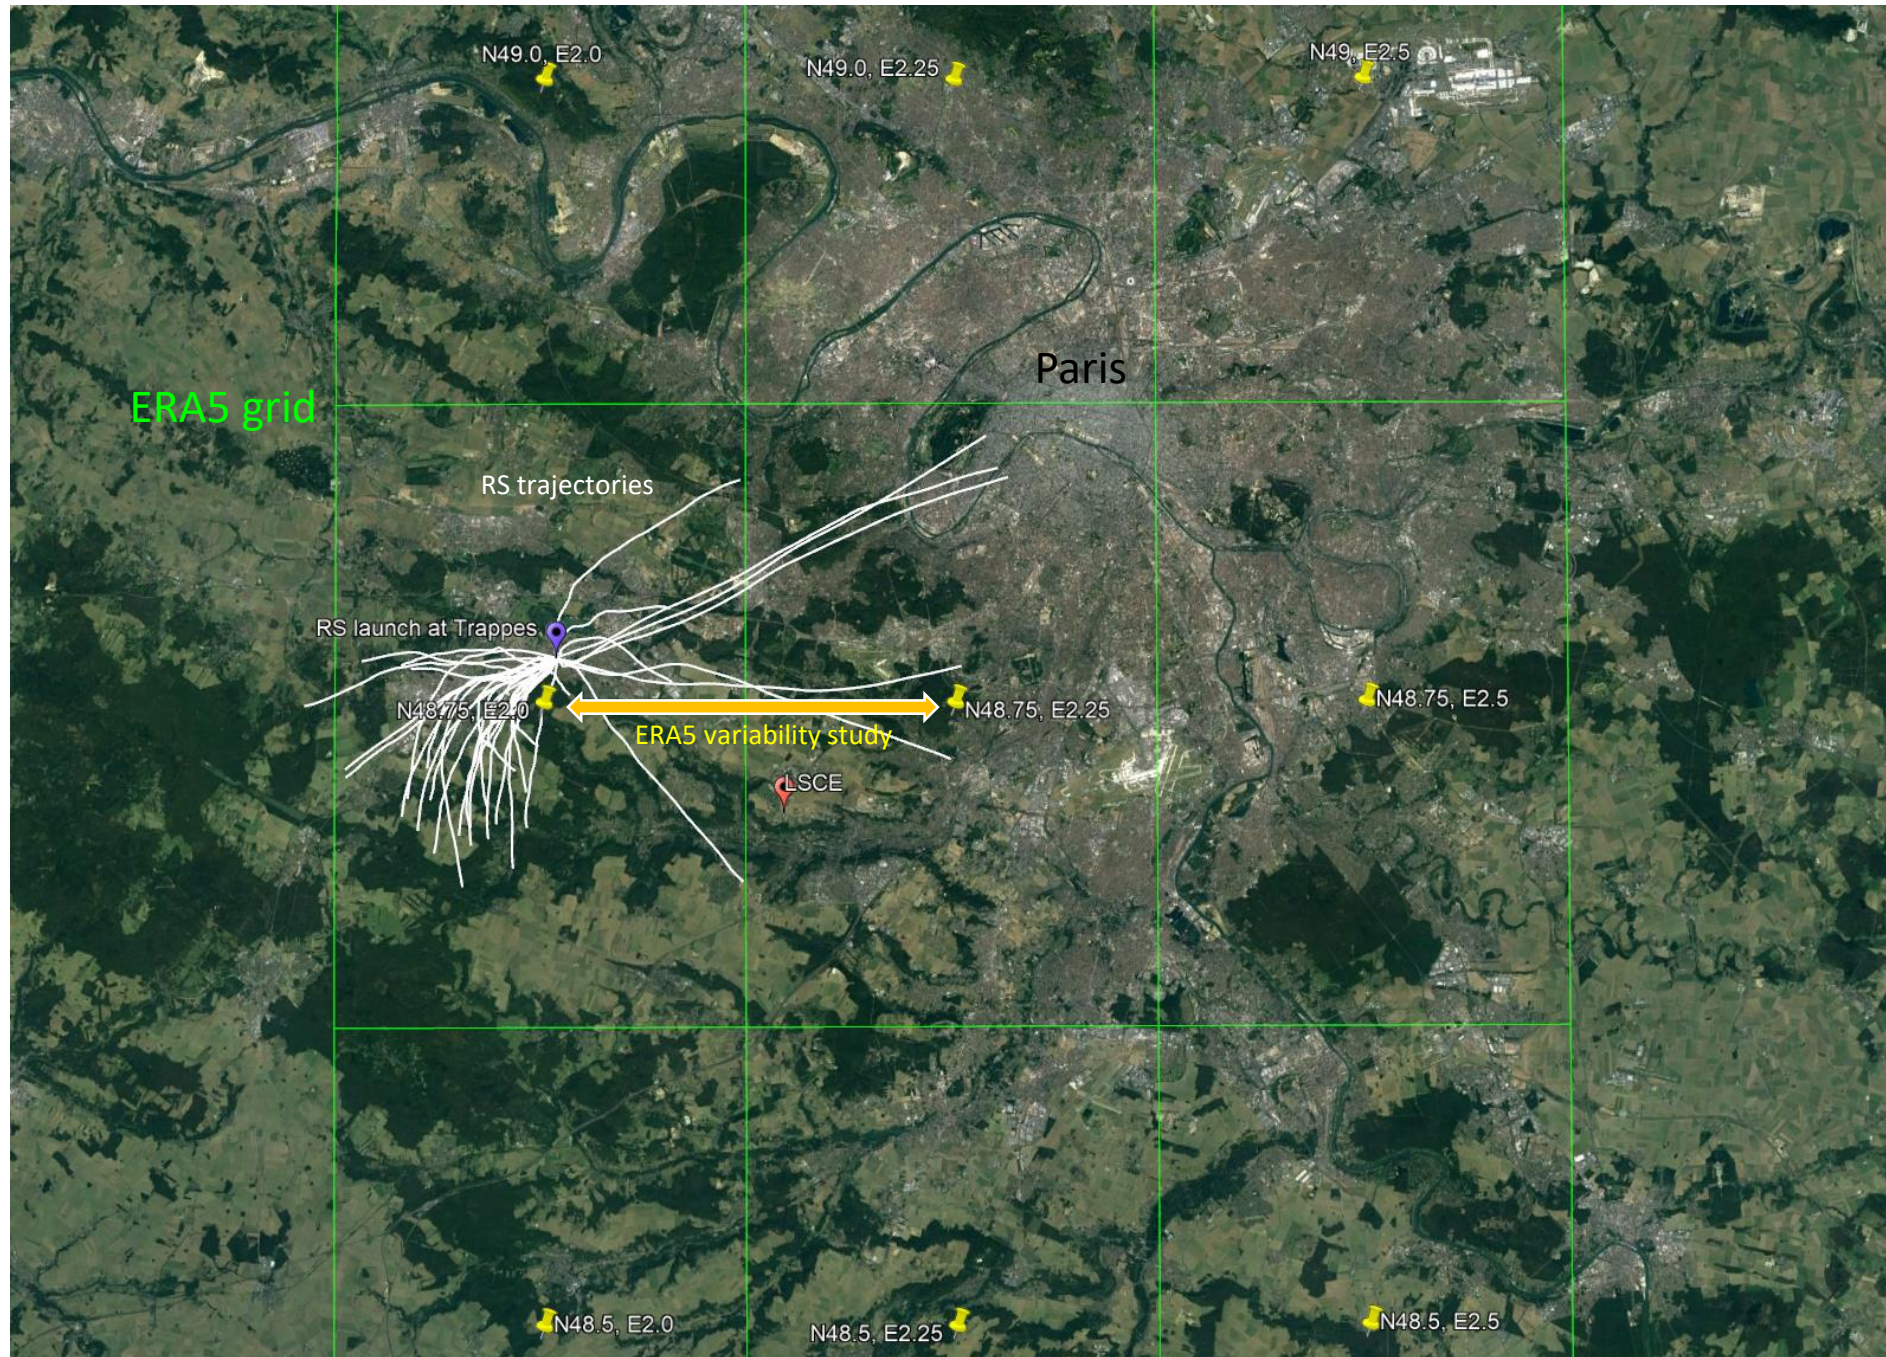

Supplement: Supplementary file [file amt-2021-132-AC1-supplement.pdf]
